# Supplementary material
Source: MDPI journal article supplement (https://www.mdpi.com/2673-9623/3/4/32)
Supplement: s1 [file s1]

## Supplementary information

# Novel Nicotinamide *N*-methyltransferase Inhibitors

Alison T. Ung \*, Matthew Payne

School of Mathematical and Physical Sciences, Faculty of Science, University of Technology Sydney, Broadway, Sydney, NSW 2007, Australia;  
mwpn@novonordisk.com

\* Correspondence: alison.ung@uts.edu.au

| Table of contents                                                                                                                                                                                                                                                                                         | Page |
|-----------------------------------------------------------------------------------------------------------------------------------------------------------------------------------------------------------------------------------------------------------------------------------------------------------|------|
| <b>Figure S1:</b> Lilly OIDD hNNMT Flow Scheme and Assay Measures.                                                                                                                                                                                                                                        | 2    |
| <b>Table S1.</b> Inhibitory activity (%) of compounds <b>4a-n</b> against human nicotinamide <i>N</i> -methyltransferase (hNNMT) at 10 $\mu$ M.                                                                                                                                                           | 3    |
| <b>Figure S2.</b> Concentration-response curve (CRC, IC <sub>50</sub> ) of Nicotinamide <i>N</i> -methyltransferase (hNNMT) enzymatic modulation using LC/MS assay via monitoring <i>S</i> -adenosyl-L-homocysteine SAH production; for (A) <b>4a</b> ; (B) <b>4c</b> ; (C) <b>4f</b> and (D) <b>4h</b> . | 4    |
| <b>Figure S3.</b> Cell viability assay, the percentage growth inhibition of basal-HEK293 cells for (A) compound <b>4a</b> , (B) compound <b>4c</b> , and (C) compound <b>4f</b> .                                                                                                                         | 5    |
| <b>Table S2.</b> Interactions between hNNMT (6CHH) and <b>MS2734</b> , <b>MvH45</b> and <b>4a-n</b> .                                                                                                                                                                                                     | 6-11 |

## Oncology – NNMT Inhibitor

Metabolic changes driven by activation of oncogenes, inactivation of tumor suppressors, and pro-tumorigenic mutations are considered a hallmark of cancer. One cancer-associated metabolic enzyme, Nicotinamide N-Methyltransferase (NNMT), catalyses the transfer of methyl groups from the methyl donor S-adenosyl-L-methionine (SAM) to nicotinamide, generating S-Adenosylhomocysteine (SAH) and methylnicotinamide (MNAM). Previous reports have connected the increased expression levels of NNMT in cancer cells with chemotherapy and radiation resistance as well as increased tumor aggressiveness.

Furthermore, downregulation or silencing of NNMT has been shown to increase the sensitivity of carcinoma cells to radiation therapy and decrease tumorigenicity, providing key support for the role of NNMT in promoting treatment resistance and tumorigenesis in cancer cells. Thus, compounds able to modulate the activity of NNMT in the setting of oncology may have therapeutic utility.

- Ulanovskaya OA, Zuhl AM, Cravatt BF. (2013) NNMT promotes epigenetic remodeling in cancer by creating a metabolic methylation sink. *Nature chemical biology*. 9(5):300-6.
- Sauve AA. (2008) NAD<sup>+</sup> and vitamin B3: from metabolism to therapies. *J Pharmacol Exp Ther*. 324(3):883-93.
- van Haren, M.J., Sastre Toraño, J., Sartini, D., Emanuelli, M., Parsons, R.B., \*Martin, N.I. (2016). A rapid and efficient assay for the characterization of substrates and inhibitors of nicotinamide N-methyltransferase. *Biochemistry*, 55(37):5307-15.

## Flow Scheme & Assay Measures

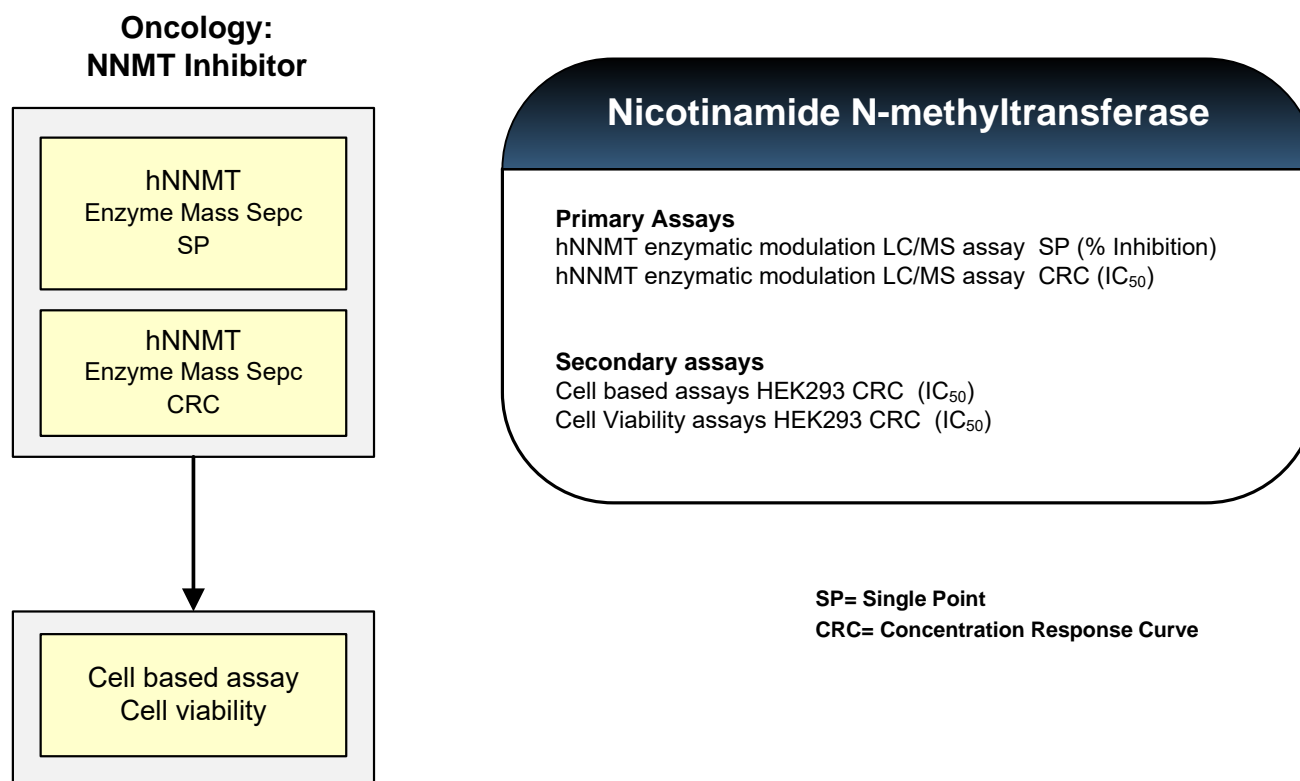

**Figure S1:** Lilly IODD hNNMT Flow Scheme and Assay Measures.

**Table S1.** Inhibitory activity (%) of compounds **4a-n** against human Nicotinamide *N*-methyltransferase (hNNMT) at 10  $\mu$ M.

| Compound  | hNNMT MNA,<br>% inhibition at 10 $\mu$ M | hNNMT SAH,<br>% inhibition at 10 $\mu$ M |
|-----------|------------------------------------------|------------------------------------------|
| <b>4a</b> | 91.29                                    | 89.73                                    |
| <b>4b</b> | 40.09                                    | 40.16                                    |
| <b>4c</b> | 58.68                                    | 56.76                                    |
| <b>4d</b> | -10.32                                   | -20.17                                   |
| <b>4e</b> | -5.752                                   | 1.149                                    |
| <b>4f</b> | 86.74                                    | 87.21                                    |
| <b>4g</b> | -1.373                                   | 5.125                                    |
| <b>4h</b> | 99.34                                    | 99.13                                    |
| <b>4i</b> | -2.608                                   | 2.511                                    |
| <b>4j</b> | 8.277                                    | 20.07                                    |
| <b>4k</b> | 2.19                                     | ND                                       |
| <b>4l</b> | -16.81                                   | -11.16                                   |
| <b>4m</b> | 97.99                                    | 97.99                                    |
| <b>4n</b> | -2.382                                   | ND                                       |

ND: Not determined

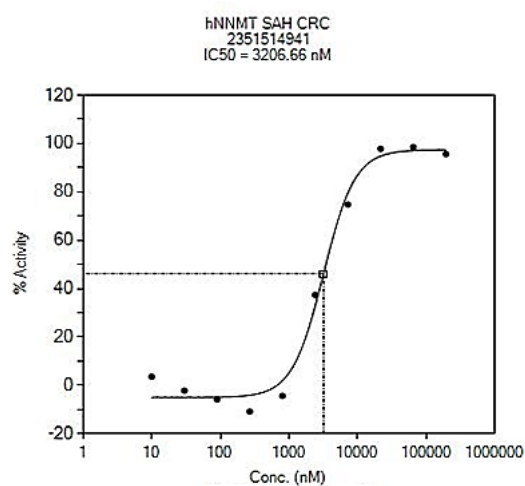

(A)

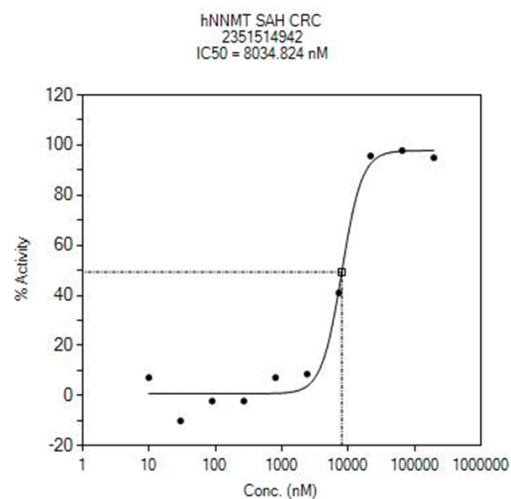

(B)

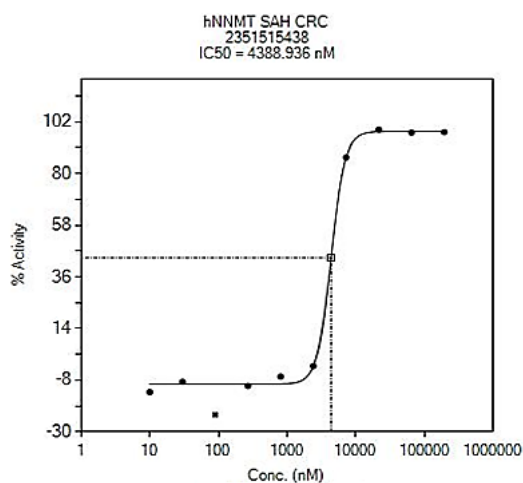

(C)

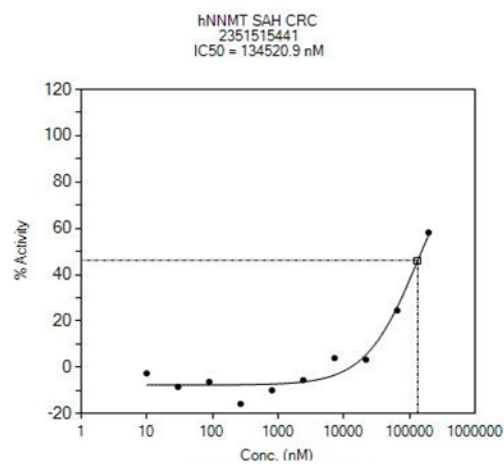

(D)

**Figure S2.** Concentration-response curve (CRC, IC<sub>50</sub>) of Nicotinamide *N*-methyltransferase (hNNMT) enzymatic modulation using LC/MS assay via monitoring *S*-adenosyl-L-homocysteine SAH production; for (A) **4a**, (B) **4c**, (C) **4f** and (D) **4h**.

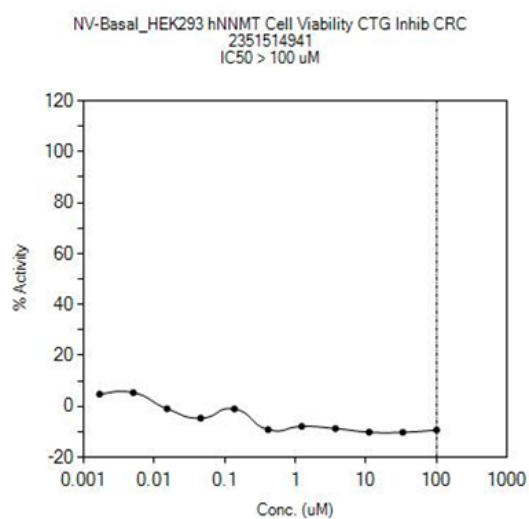

(A)

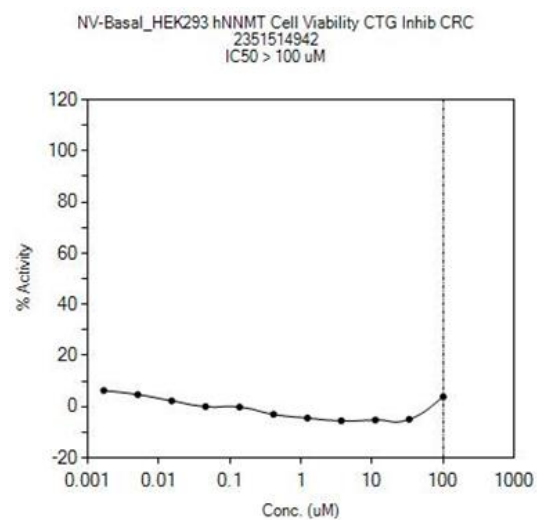

(B)

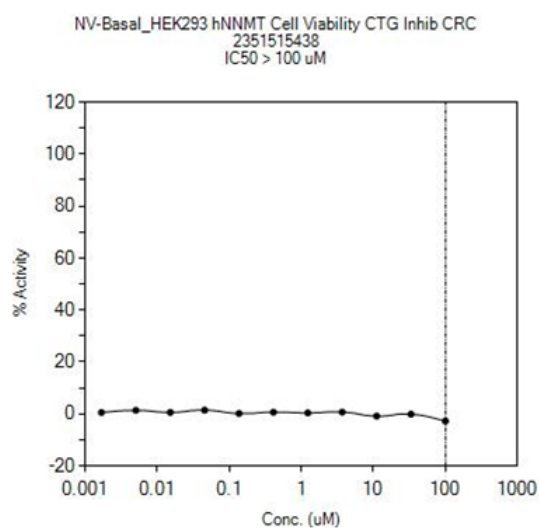

(C)

**Figure S3.** Cell viability assay, the percentage growth inhibition of basal-HEK293 cells for (A) compound **4a**, (B) compound **4c**, and (C) compound **4f**.

**Table S2.** Interactions between hNNMT (6CHH) and **MS2734**, **MvH45** and **4a-n**.

| Compound            | 3D interaction surface                                                             | 3D interactions                                                                     | 2D interactions                                                                      |
|---------------------|------------------------------------------------------------------------------------|-------------------------------------------------------------------------------------|--------------------------------------------------------------------------------------|
| MX2734 in<br>6CHH   | 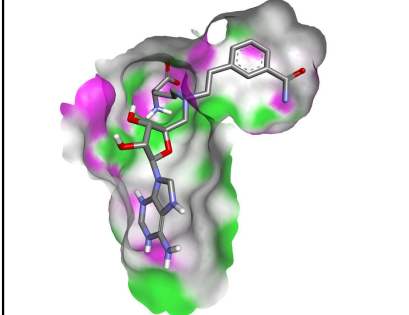  |   |   |
| Re-docked<br>MS2734 |   |   |   |
| MvH45               |  |  |  |

**Table S2.** Interactions between hNNMT (6CHH) and **MS2734**, **MvH45** and **4a-n**.

| Compound | 3D interaction surface                                                             | 3D interactions                                                                     | 2D interactions                                                                      |
|----------|------------------------------------------------------------------------------------|-------------------------------------------------------------------------------------|--------------------------------------------------------------------------------------|
| 4a       | 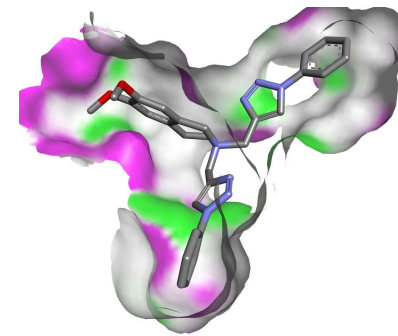  |   |   |
| 4b       |   |   |   |
| 4c       |  |  |  |



**Table S2 (cont).** Interactions between hNNMT (6CHH) and **MS2734**, **MvH45** and **4a-n**.

| Compound | 3D interaction surface                                                              | 3D interactions                                                                      | 2D interactions                                                                       |
|----------|-------------------------------------------------------------------------------------|--------------------------------------------------------------------------------------|---------------------------------------------------------------------------------------|
| 4d       | 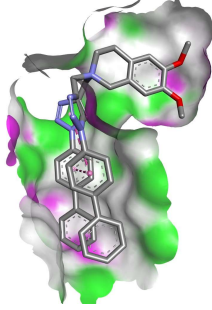   |    |    |
| 4e       |    |    |    |
| 4f       |  |  |  |



**Table S2 (cont).** Interactions between hNNMT (6CHH) and **MS2734**, **MvH45** and **4a-n**.

| Compound | 3D interaction surface                                                              | 3D interactions                                                                      | 2D interactions                                                                       |
|----------|-------------------------------------------------------------------------------------|--------------------------------------------------------------------------------------|---------------------------------------------------------------------------------------|
| 4g       | 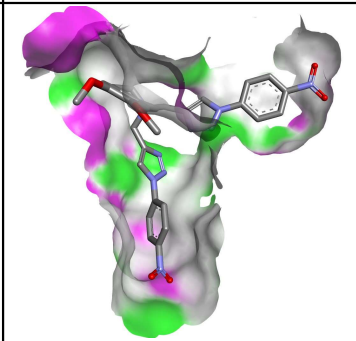   |    |    |
| 4h       |    |    |    |
| 4i       |  |  |  |

**Table S2 (con.).** Interactions between hNNMT (6CHH) and **MS2734**, **MvH45** and **4a-n**.

| Compound | 3D interaction surface                                                              | 3D interactions                                                                      | 2D interactions                                                                       |
|----------|-------------------------------------------------------------------------------------|--------------------------------------------------------------------------------------|---------------------------------------------------------------------------------------|
| 4j       | 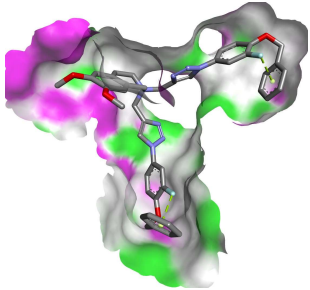   |    |    |
| 4k       |   |   |    |
| 4l       |  |  |  |

**Table S2 (cont.).** Interactions between hNNMT (6CHH) and **MS2734**, **MvH45** and **4a-n**.

| Compound | 3D interaction surface                                                            | 3D interactions                                                                     | 2D interactions                                                                      |
|----------|-----------------------------------------------------------------------------------|-------------------------------------------------------------------------------------|--------------------------------------------------------------------------------------|
| 4m       | 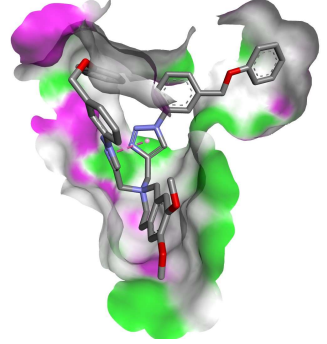 |   |   |
| 4n       |  |  |  |
